# Supplementary material for: Docosahexaenoic acid preserves visual function by maintaining correct disc morphology in retinal photoreceptor cells
Source: PubMed Central journal article supplement (PMC5519357; doi:10.1074/jbc.m117.790568), 2017-06-03
Supplement: 10.1074_M117.790568_jbc.M117.790568-2.pdf [file 10.1074_M117.790568_jbc.M117.790568-2.pdf]

Fig. S2

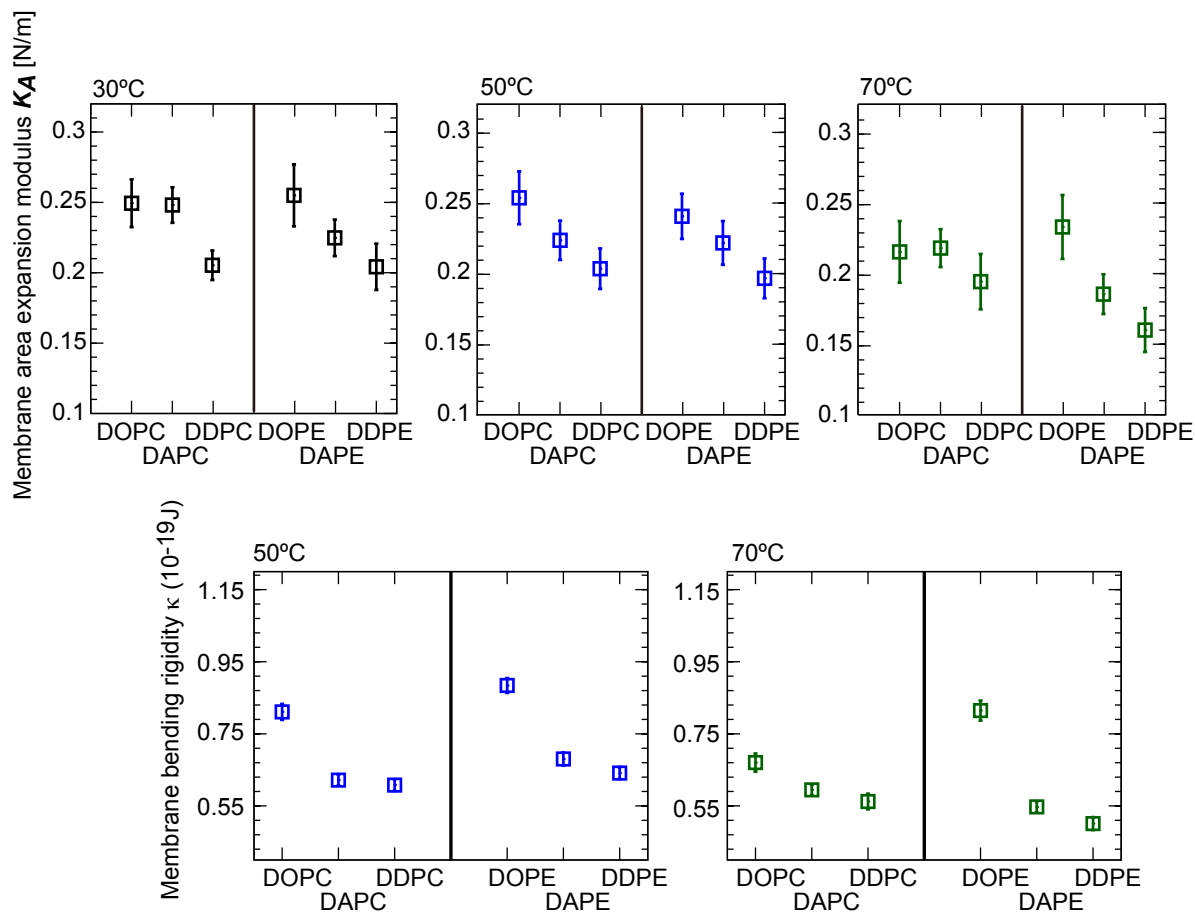

Fig. S2. Area expansion modulus and membrane bending rigidity at 50°C and 70°C.

The area expansion modulus  $KA$  at 30°C, 50°C, and 70°C, and membrane bending rigidity  $\kappa$  at 50°C and 70°C were calculated by MD simulations. Although the differences at 50°C and 70°C were smaller than at 30°C (Fig. 2C), the lowest values were observed in DDPC. Effect of double bond number in fatty acids on  $\kappa$  and  $KA$  value decreased at higher temperatures. DDPE also showed similar results with those of DDPC. Statistical errors are estimated using the block average method (1).

(1) Allen, M.P., & Tildesley, D.J. (1989) Computer simulation of liquids. Oxford university press.
